# Supplementary material for: In situ assembly of well-dispersed Ag nanoparticles (AgNPs) on electrospun carbon nanofibers (CNFs) for catalytic reduction of 4-nitrophenol
Source: Royal Society of Chemistry journal article supplement (doi:10.1039/c1nr10405e), 2011-01-01
Supplement: c1nr10405e.pdf [file c1nr10405e.pdf]

# **In situ assembly of well-dispersed Ag nanoparticles (AgNPs) on electrospun carbon nanofibers (CNFs) for catalytic reduction of 4-nitrophenol**

Peng Zhang,<sup>a</sup> Changlu Shao,\*<sup>a</sup> Zhenyi Zhang,<sup>a</sup> Mingyi Zhang,<sup>a</sup> Jingbo Mu,<sup>ab</sup> Zengcai Guo,<sup>ab</sup> and Yichun Liu<sup>a</sup>

<sup>a</sup>Center for Advanced Optoelectronic Functional Materials Research, and Key Laboratory of UV Light-Emitting Materials and Technology of Ministry of Education, Northeast Normal University, 5268 Renmin Street, Changchun 130024, People's Republic of China.

<sup>b</sup>Department of Chemistry, Northeast Normal University. People's Republic of China.

\*Corresponding author: Changlu Shao

Center for Advanced Optoelectronic Functional Materials Research, and Key Laboratory of UV Light-Emitting Materials and Technology of Ministry of Education, Northeast Normal University, 5268 Renmin Street, Changchun 130024, People's Republic of China.

E-mail: [clshao@nenu.edu.cn](mailto:clshao@nenu.edu.cn); Tel. 8643185098803.

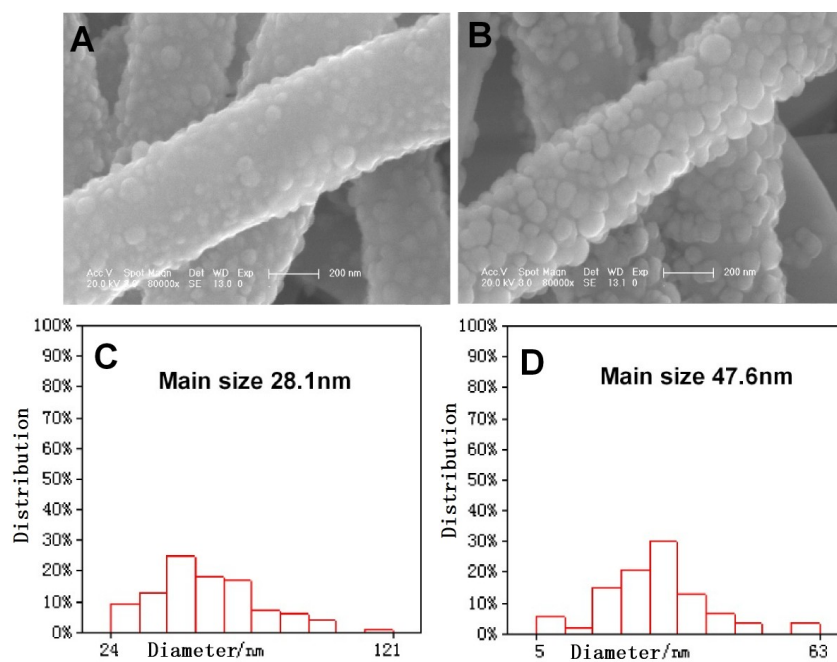

**Fig. S1.** The representative SEM images (A, B) and size distribution of AgNPs (C, D) of S1 and S2.
